# Supplementary material for: The Effects of Rhubarb for the Treatment of Diabetic Nephropathy in Animals: A Systematic Review and Meta-analysis
Source: Front Pharmacol. 2021 Jun 11;12:602816. doi: 10.3389/fphar.2021.602816 (PMC8226322; doi:10.3389/fphar.2021.602816)
Supplement: Supplementary file 5 [file DataSheet1.xlsx]

## Sheet: PICOS
Table 1 PICOS criteria for inclusion and exclusion of studies
Parameter		Inclusion criteria	exclusion criteria
Participants		DN animal model (rats or mice, regardless of sex, age or weight, modeling method) was induced to meet the standard of diabetic nephropathy, blood glucose ≥ 16.65 mmol/L;	other animal models except for rats and mice (eg. patients, in vitro cells, rabbits, dogs, and other animal models);
Interventions		rhubarb (contained rhubarb, emodin, and rhein) was given by gavage, without limited administration period, frequency and dose;	animals with rhubarb compound treatment, or rhubarb were administrated in other ways (such as intravenous injection or intraperitoneal injection);
Control		vehicle-treated animals, sham-treated animals(saline or distilled water), animals undergoing no treatment;	animals with western medicine, other traditional Chinese medicine or integrated Chinese and Western medicine;
Primary outcomes		blood glucose, HbA1c, Scr, BUN, ACR, UP, UAE;	other diabetic nephropathy outcomes;
Secondary outcomes		kidney index,TII, TGF-β1 mRNA and protein,α-SMA mRNA and protein, E-cad mRNA and protein, podocin mRNA and protein, nephrin mRNA and protein;
study designs		randomized controlled trials, controlled studies with a separate control group.	semi-randomized or non-randomized controlled trials, multiple publication, incomplete original data, cross-over studies, review, case report, case analysis, meta-analysis, patent, studies without a separate control group.

## Sheet: rhein
Table 2 Characteristics of studies with rhein-treated
author,year	number(E,C)	age or weight（g)	gender	species	model		rhein dose(mg/kg)	control	period	outcomes
Hu et al.,2011	8 8 8,8	220±20	male	SD rats	STZ (65mg/kg),ip		200,100,50	0.5%CMC-Na	4w	Scr,BUN,UP
Gao et al.,2010	6,6	8weeks	male,female	db/db mice	C57BL/Ksj db/db mice		150	saline	12w	Scr,UAE,Glu,TGF-β1 pro
Ai et al.,2004	9,8	150-190	male	Wistar rats	STZ（50mg/kg),ip		70	saline	12w	Glu,BUN,UP
Chen,2015a	8,8	8weeks 180-220	male	Wistar rats	high-fat diet 8w and STZ(25mg/kg),ip		80	saline	8w	Glu,UP,TGF-β1mRNA and pro
Chen et al.,2013	6,6	170-200	male	Wistar rats	STZ（50mg/kg),ip		150	saline	8w	Glu,Scr,BUN,UP,nephrin pro
Chen et al.,2015b	10 10 10,11	8weeks 180-220	male	SD rats	high fat-sugar diet 4w and STZ(35mg/kg),ip		50,100,150	saline	10w	Glu,Scr,UP
Hu et al.,2014	20,20	200±240	male	SD rats	high fat-sugar diet 2w and STZ(35mg/kg),ip		100	saline	8w	Glu,UP,UAE,ACR,KW/BW
Jin et al.,2008	12,12	8weeks 220-250	male	Wistar rats	STZ(55mg/kg),ip		100	0.5%CMC-Na	16w	Scr,UP,TII,TGF-β1 pro,α-SMA pro
Li,2010	11,10	8weeks 200-220	male	Wistar rats	STZ(65mg/kg),ip		100	0.5%CMC-Na	10w	Glu,UP
Li,2008	12,12	8weeks 220-250	male	Wistar rats	STZ(55mg/kg),ip		100	saline	16w	Scr,UP,TII,α-SMA pro,E-cad pro
Liu and Ning,2007	20,20	8weeks 220-250	male	Wistar rats	STZ(60mg/kg),ip		150	pure water	16w	Glu,UP,TII，α-SMA pro
Wang,2008	8,8	8weeks 200±50	male	Wistar rats	high fat-sugar diet 8w and STZ(25mg/kg),ip		100	saline	8w	Glu,UP,TGF-β1 mRNA
Wang et al.,2012	10 10 10,10	150-180	male,female	Wistar rats	STZ(40mg/kg),ip		70,70,100	saline	12w	Glu,BUN,UP
Yang et al.,2020	12,12	8weeks 220-250	male	Wistar rats	STZ(55mg/kg),ip		100	0.5%CMC-Na	16w	TII,E-cad pro,α-SMA pro,TGF-β1pro

## Sheet: emodin
Table 3 Characteristics of studies with emodin-treated
author,year	number(E,C)	age or weight（g)	gender	species	model		emodin dose(mg/kg)	control	period	outcomes
Chen et al.,2015c	12,12	200-220	male	SD rats	STZ (60mg/kg),ip		20	saline	12w	GLU,ACR,nephrin pro
Jing et al.,2017	8,8	8weeks 200-230	female	Wistar rats	STZ (60mg/kg),ip		100	unclear	3w	GLU,Scr,UAE,TII
Gao et al.,2014	4,4	200-225	male	SD rats	STZ (65mg/kg),ip		30	corn oil	10d	GLU,UP
Tian et al.,2018	8 8,8	8weeks	male	KK-Ay mice	research forage 4w		40,80	0.5%CMC-Na	8w	Scr,BUN,UAE,nephrin pro
Shi,2017	9,9	200±20	male	Wistar rats	STZ (60mg/kg),ip		100	saline	8w	GLU,Scr,BUN
Yang et al.,2016	12,12	12weeks 280-300	male	SD rats	STZ (50mg/kg),iv		40	distilled water	36w	GLU,HbA1c,KW/BW,UAE
Zhu,2006	18，18	8-10weeks 160-220	male	SD rats	STZ (60mg/kg),iv		100	0.5%CMC-Na	8w	GLU,Scr,BUN,UP,TGF-β1 mRNA and pro

## Sheet: rhubarb
Table 4 Characteristics of studies with rhubarb-treated
author,year	number(E,C)	age or weight（g)	gender	species	model		rhubarb extract dose(mg/kg)	control	period	outcomes
Hamzeh et al.,2014	6 6,6	200±20	female	Wistar rats	alloxan（120mg/kg), ip		75150	saline	28d	Glu,Scr,BUN
Li et al.,2017	6 6 6,6	180-220	male	SD rats	STZ (65mg/kg),ip		37.5,75,150	unclear	12w	Glu,Scr,BUN,UP
Yokozawa et al.,1997	9,8	200	male	Wistar rats	section of one half of the left kidney and total excision of the right kidney,STZ (30mg/kg),ip		125	water	80d	Glu,Scr,BUN,UP
Ni,2004	18,18	12weeks 160-200	male,female	SD rats	STZ (70mg/kg),ip		500	saline	8w	Glu,UAE,Scr
Tan,2003a	10 10 10 10,10	24-28	male	mice	Alloxan(70mg/kg),iv		5000,10000,5000,10000	0.5%CMC	2w	Glu,Scr,BUN,KW/BW
Tan,2003b	10 10 10,10	200-240	male	SD rats	STZ (65mg/kg),ip		25,50,100	0.5%CMC	8w	Glu,Scr,BUN,UAE,KW/BW
Xue,2019	9 10 10,8	4-5weeks 150±10	male	SD rats	STZ (55mg/kg),ip		1042,2083,4164	distilled water	8w	GLU,Scr,BUN,UP,KW/BW

## Sheet: purity and source
Table 5 Information of each studies
Study	Species	Source	Purity(%)	Chemical analysis reported?
Hu et al.,2011	rhein dry powder	Zhejiang Chinese Medicine University	Unclear	Unclear
Gao et al.,2010	rhein dry powder	Qinghai province, Peopleʼs Republic ofChina	> 98%	HPLC,voucher specimen (No. 051006)
Ai et al.,2004	rhein dry powder	General Hospital of Nanjing Military Region	> 90%	Unclear
Chen,2015a	rhein dry powder	Mediga, USA	> 98%	Batch number DHS090211-HP
Chen et al.,2013	rhein dry powder	Beijing Xingshi Hall	Unclear	Unclear
Chen et al.,2015b	rhein dry powder	Nanjing zelang Pharmaceutical Co., Ltd	> 98%	Unclear
Hu et al.,2014	rhein dry powder	Shanghai Yuanye Biotechnology Co., Ltd	≥ 98%	Batch number 20121200
Jin et al.,2008	rhein dry powder	Unclear	Unclear	Unclear
Li,2010	rhein dry powder	Xi'an Chongxin natural additive Co., Ltd	> 98%	HPLC
Li,2008	rhein dry powder	Institute of Nephrology, PLA, Nanjing General Hospital, Nanjing Military Region	Unclear	Unclear
Liu and Ning,2007	rhein dry powder	Institute of traditional Chinese medicine, Hubei University for Nationalities	0.94	Unclear
Wang,2008	rhein dry powder	Mediga, USA	> 98%	HPLC
Wang et al.,2012	rhein dry powder	Nanjing zelang Pharmaceutical Co., Ltd	> 97%	Batch number 20081124
Yang et al.,2020	rhein dry powder	China Pharmaceutical University	Unclear	Unclear
Chen et al.,2015c	emodin dry powder	Nanjing Qingze Medical Technology Development Co.,Ltd	>99%	Unclear
Jing et al.,2017	emodin dry powder	Sigma-Aldrich, Inc.; Merck KGaA	Unclear	Unclear
Gao et al.,2014	emodin dry powder	Sigma (St. Louis, USA)	Unclear	Unclear
Tian et al.,2018	emodin dry powder	Pufei De Biotech. Co. Ltd	≥ 98%	HPLC
Shi,2017	emodin dry powder	Shaanxi Senfu Natural Products Co., Ltd	Unclear	Batch number DSH160117
Yang et al.,2016	emodin dry powder	Dalian Meilun Biotechnology Co., Ltd	Unclear	Batch number 518-82-1
Zhu,2006	emodin dry powder	Huaiyin City, Jiangsu Province, China	Unclear	Unclear
Hamzeh et al.,2014	rhubarb dry powder	the Dalavan Mountains of West Azerbaijan in northwest of Iran in frontier localities between Iran and Iraqin	Unclear	authenticated by Department of Biology, science department, Urmia University
Li et al.,2017	rhubarb dry powder	Bozhou traditional Chinese medicine market (Anhui Province, China).	Unclear	Specimen (No. 201506)
Yokozawa et al.,1997	rhubarb dry powder	commercial(unclear)	0.25	Unclear
Ni,2004	rhubarb dry powder	Unclear	Unclear	Unclear
Tan,2003a	rhubarb dry powder	Department of pharmacy, Sichuan Institute of traditional Chinese Medicine	Unclear	Unclear
Tan,2003b	rhubarb dry powder	Department of pharmacy, Sichuan Institute of traditional Chinese Medicine	Unclear	Unclear
Xue,2019	rhubarb dry powder	Chinese pharmacy of Inner Mongolia Chinese Hospital Affiliated to Inner Mongolia Medical University	Unclear	Unclear

## Sheet: Glucose
Table 6 Subgroup analysis of blood glucose
Variables	No. of studies	No. of participants	SMD [95%CI]	P-value
Dosage
low ≤50	6	105	-0.53 [-0.95, -0.12]	0.05
medium 50<x≤100	13	260	-1.33 [-1.98, -0.68]
high >100	10	238	-1.26 [-1.89, -0.64]
Drug types
rhein	10	250	-1.48 [-2.02, -0.94]	0.21
emodin	6	126	-0.71 [-1.48, 0.05]
rhubarb	7	227	-0.96 [-1.53, -0.38]
Duration
<8w	7	163	-0.81 [-1.57, -0.04]	0.14
8w≤t<16w	17	376	-1.32 [-1.75, -0.89]
≥16w	2	64	-0.60 [-1.22, 0.01]
Species
SD rats	10	312	-0.96 [-1.37, -0.54]	0.02
Wistar rats	11	227	-1.78 [-2.60, -0.95]
mice	2	64	-0.36 [-0.94, 0.23]

## Sheet: Scr
Table 7 Subgroup analysis of Scr
Variables	No. of studies	No. of participants	SMD [95%CI]	P-value
Dosage
low ≤50	5	72	-1.85 [-2.67, -1.03]	0.43
medium 50<x≤100	11	185	-1.61 [-2.46, -0.75]
high >100	9	173	-2.49 [-3.54, -1.44]
Drug types
rhein	6	145	-2.20 [-3.15, -1.26]	0.3
emodin	4	94	-1.05 [-2.41, 0.31]
rhubarb	6	191	-2.24 [-3.05, -1.44]
Duration
<8w	6	164	-2.44 [-3.56, -1.32]	0.23
8w≤t<16w	12	242	-1.94 [-2.68, -1.20]
≥16w	2	24	-1.23 [-2.13, -0.32]
Species
SD rats	6	213	-2.17 [-2.87, -1.47]	0.82
Wistar rats	7	129	-1.72 [-3.10, -0.35]
mice	3	88	-1.93 [-2.72, -1.15]

## Sheet: BUN
Table 8 Subgroup analysis of BUN
Variables	No. of studies	No. of participants	SMD [95%CI]	P-value
Dosage
low ≤50	4	59	-0.69 [-1.30, -0.09]	0.12
medium 50<x≤100	9	161	-1.30 [-2.01, -0.59]
high >100	7	147	-1.95 [-3.09, -0.81]
Drug types
rhein	4	98	-2.18 [-2.76, -1.59]	0.0004
emodin	3	78	-0.44 [-1.09, 0.20]
rhubarb	6	191	-1.18 [-1.92, -0.43]
Duration
<8w	5	148	-0.92 [-1.74, -0.11]	0.25
8w≤t<16w	10	219	-1.51 [-2.10, -0.91]
≥16w	0	0	Not estimable
Species
SD rats	5	173	-1.42 [-2.21, -0.64]	0.04
Wistar rats	6	118	-1.79 [-2.73, -0.85]
mice	2	76	-0.45 [-1.12, 0.22]

## Sheet: UP
Table 9 Subgroup analysis of UP
Variables	No. of studies	No. of participants	SMD [95%CI]	P-value
Dosage
low ≤50	3	29	-1.47 [-2.42, -0.52]	0.06
medium 50<x≤100	11	251	-1.65 [-2.10, -1.19]
high >100	6	129	-4.31 [-6.53, -2.09]
Drug types
rhein	11	286	-2.01 [-2.47, -1.55]	0.003
emodin	2	44	-0.58 [-1.44, 0.27]
rhubarb	3	79	-3.95 [-6.48, -1.42]
Duration
<8w	2	32	-0.41 [-1.50, 0.68]	0.01
8w≤t<16w	14	313	-2.37 [-3.05, -1.70]
≥16w	3	64	-1.86 [-2.46, -1.25]
Species
SD rats	6	186	-2.30 [-3.20, -1.40]	0.41
Wistar rats	10	223	-1.82 [-2.51, -1.13]
mice	0	0	Not estimable

## Sheet: Egger's test
Table 10 Egger's test
	Std_Eff	Coef.	Std. Err.	t	P>|t|	[95% Conf. Interval]
blood glucose	slope	0.823983	0.419984	1.96	0.056	-0.0235793	1.67155
	bias	-2.93572	0.642215	-4.57	0.000	-4.23176	-1.63967
Scr	slope	2.33225	0.254234	9.17	0.000	1.81664	2.84786
	bias	-4.90911	0.306088	-16.04	0.000	-5.52989	-4.28834
BUN	slope	2.36247	0.490976	4.81	0.000	1.36112	3.36383
	bias	-4.58598	0.633504	-7.24	0.000	-5.87802	-3.29394
UP	slope	0.55878	0.464581	1.2	0.24	-0.39618	1.51374
	bias	-3.56109	0.663991	-5.36	0.000	-4.92595	-2.19624

[truncated: 3 more sheets: Glucose(rhein treatment) , Glucose(emodin treatment), Glucose(rhubarb treatment) ]
